# Supplementary material for: Apps in der Rheumatologie
Source: Springer Nature journal article supplement (doi:10.1007/s00393-021-01104-1), 2021-10-07
Supplement: MOESM1 [file 19737354]

## **Symptome**

### **1. Wie oft sind diese Symptome in den letzten 2 Monaten bei Ihnen aufgetreten?**

|                                        | täglich               | mehrmals<br>die Woche | ca. 1x pro<br>Woche   | seltener              | nie                   |
|----------------------------------------|-----------------------|-----------------------|-----------------------|-----------------------|-----------------------|
| Nacken-, Hüft- oder<br>Rückenschmerzen | <input type="radio"/> | <input type="radio"/> | <input type="radio"/> | <input type="radio"/> | <input type="radio"/> |
| Morgensteifigkeit                      | <input type="radio"/> | <input type="radio"/> | <input type="radio"/> | <input type="radio"/> | <input type="radio"/> |
| Ausgeprägte<br>Müdigkeit (Fatigue)     | <input type="radio"/> | <input type="radio"/> | <input type="radio"/> | <input type="radio"/> | <input type="radio"/> |
| Ein- oder<br>Durchschlafprobleme       | <input type="radio"/> | <input type="radio"/> | <input type="radio"/> | <input type="radio"/> | <input type="radio"/> |
| sonstige<br>Gelenkschmerzen            | <input type="radio"/> | <input type="radio"/> | <input type="radio"/> | <input type="radio"/> | <input type="radio"/> |

### **2. Wo genau sind die Nacken-, Hüft- oder Rückenschmerzen? (mehrere Antworten möglich)**

- Nacken
- im mittleren/oberen Rücken (Brustwirbelsäule)
- Unteren Rücken (Lendenwirbelsäule)
- Hüfte (Iliosakralgelenk)
- Ich habe keine Nacken-, Hüft- oder Rückenschmerzen

### **3. Haben Sie Versteifungen (Verknöcherungen) der Wirbelsäule, die Ihre Beweglichkeit einschränken?**

- Ja
- Nein

## **Bewegungslevel**

### **4. Wie oft haben Sie in den letzten 2 Monaten aktiv Bewegung betrieben?**

|                                                               | täglich               | mehrmals<br>die Woche | ca. 1x pro<br>Woche   | seltener/nie          |
|---------------------------------------------------------------|-----------------------|-----------------------|-----------------------|-----------------------|
| Zu Hause durchgeführte Übungen<br>für Morbus Bechterew        | <input type="radio"/> | <input type="radio"/> | <input type="radio"/> | <input type="radio"/> |
| Physiotherapie/Krankengymnastik<br>mit Therapeuten            | <input type="radio"/> | <input type="radio"/> | <input type="radio"/> | <input type="radio"/> |
| Bewegungstherapie in der Gruppe                               | <input type="radio"/> | <input type="radio"/> | <input type="radio"/> | <input type="radio"/> |
| leichte Bewegung (z.B. längerer<br>Spaziergang)               | <input type="radio"/> | <input type="radio"/> | <input type="radio"/> | <input type="radio"/> |
| anderer Sport (z.B. Radfahren,<br>Schwimmen, Kraftsport, ...) | <input type="radio"/> | <input type="radio"/> | <input type="radio"/> | <input type="radio"/> |
| Sonstiges (Gymnastik, Yoga, ...)                              | <input type="radio"/> | <input type="radio"/> | <input type="radio"/> | <input type="radio"/> |

### **5. Wie viele Minuten in der Woche betreiben Sie aktiv Bewegung? (insgesamt)**

- mehr als 180 Minuten
- 120-180 Minuten
- 90-120 Minuten
- 60-90 Minuten
- 30-60 Minuten
- weniger als 30 Minuten

**6. Haben Sie das Gefühl, dass Ihnen Bewegung hilft?**

- Ja
- Manchmal
- Nein
- Weiß nicht

**7. Haben Sie das Gefühl, ausreichend Morbus-Bechterew-spezifische Übungen zu kennen?**

- Ja
- Nein

**8. Würden Sie sich gerne mehr bewegen?**

- Ja
- Nein

**9. OPTIONAL: Wie könnte eine App Sie dabei unterstützen, sich mehr zu bewegen?**

### **Aktuelle App-Nutzung**

**10. Nutzen Sie bereits Apps, die Ihnen beim Umgang mit Morbus Bechterew helfen? (Mehrfachauswahl möglich)**

- Ja, um spezielle Übungen zu finden
- Ja, für sonstigen Sport (z.B. Samsung Health, Runtastic, ...)
- Ja, für die Dokumentation der Medikamenteneinnahme
- Nein

**11. Falls ja, verraten Sie uns, welche App Sie nutzen?**

**12. Nutzen Sie eine Smartwatch? (z.B. Fitbit, Apple Watch, ...)**

- Ja
- Nein

### **Inhalte einer "Morbus-Bechterew-App"**

**13. Können Sie sich vorstellen, dass eine App Ihnen helfen kann, mit der Krankheit besser zurechtzukommen?**

- Ja
- vielleicht
- Nein



## **Nutzung einer „Morbus-Bechterew-App“**

Die App soll nach höchsten wissenschaftlichen Standards erstellt werden und soll Patienten mit Morbus Bechterew als langfristiger Begleiter dienen. Als geprüftes Medizinprodukt wird Sie größte Datenschutzerfordernungen erfüllen und von den gesetzlichen Krankenkassen erstattet werden können. Hierfür ist es nötig, die App beim Arzt oder bei der Krankenkasse zu beantragen.

**20. Wie wahrscheinlich ist es, dass Sie eine solche App nutzen würden? (1 = sehr unwahrscheinlich; 10 = sehr wahrscheinlich)**

- |                       |                       |                       |                       |                       |                       |                       |                       |                       |                       |
|-----------------------|-----------------------|-----------------------|-----------------------|-----------------------|-----------------------|-----------------------|-----------------------|-----------------------|-----------------------|
| 1                     | 2                     | 3                     | 4                     | 5                     | 6                     | 7                     | 8                     | 9                     | 10                    |
| <input type="radio"/> | <input type="radio"/> | <input type="radio"/> | <input type="radio"/> | <input type="radio"/> | <input type="radio"/> | <input type="radio"/> | <input type="radio"/> | <input type="radio"/> | <input type="radio"/> |

**21. Falls zutreffend: Warum haben Sie Bedenken, eine solche App zu nutzen (z.B. Datenschutz)?**

**22. (FEEDBACKFRAGE, Testgruppe, wird nicht veröffentlicht)**

**23. Wie alt sind Sie?**

- 18-29
- 30-39
- 40-49
- 50-59
- 60-69
- 70 oder älter

**24. Wie lange wissen Sie schon von Ihrer Krankheit?**

- seit weniger als einem Jahr
- seit mehr als 1 Jahr
- seit mehr als 5 Jahren
- seit mehr als 10 Jahren

**25. Nehmen Sie Medikamente ein, und wenn ja welche? (mehrere Antworten möglich)**

- NSAR (z.B. Ibuprofen, Diclofenac, ...)
- Biologika (z.B. TNF-alpha-Hemmer, ...)
- Cortisonpräparat
- Methotrexat oder Sulfasalazin
- Ich nehme keine Medikamente ein.
- Sonstiges:  
[FREITEXTANTWORT]

**26. Gibt es sonst noch etwas, was Sie uns mitteilen wollen?**
